# Supplementary material for: Injectable zwitterionic thermosensitive hydrogels with low-protein adsorption and combined effect of photothermal-chemotherapy
Source: Royal Society of Chemistry journal article supplement (doi:10.1039/d0tb01763a), 2020-01-01
Supplement: d0tb01763a1.pdf [file d0tb01763a1.pdf]

Electronic Supplementary Information (ESI) for:

## Injectable zwitterionic thermosensitive hydrogels with low-protein adsorption and combined effect of photothermal-chemotherapy†

Anbi Zheng,<sup>a,1</sup> Di Wu,<sup>a,1</sup> Man Fan,<sup>a,1</sup> Hong Wang,<sup>a</sup> Yonggui Liao,<sup>a</sup> Qin Wang,<sup>\*a</sup> and Yajiang Yang<sup>a</sup>

Hubei Key Laboratory of Bioinorganic Chemistry & Materia Medica, School of Chemistry and Chemical Engineering, Huazhong University of Science and Technology, Wuhan 430074, People's Republic of China

### Chemical structure characterization of PNS nanogels

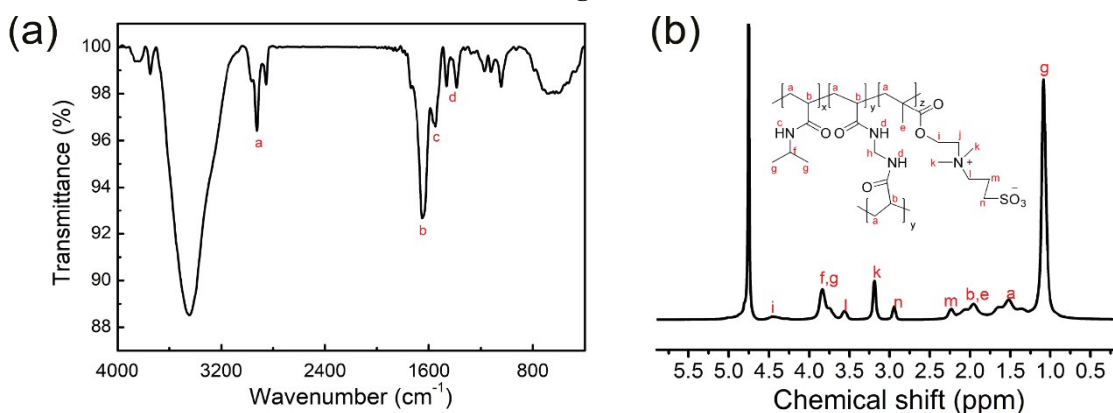

**Fig. S1** (a) FT-IR spectrum and (b) <sup>1</sup>H NMR spectrum of PNS nanogels.

The copolymerization of SBMA, NIPAM and MBA was confirmed by FTIR and <sup>1</sup>H NMR spectrum. In Fig. S1a, the peak at 2924 cm<sup>-1</sup> (peak a) is assigned to C–H stretching vibrations of methyl or methylene in polymer. The peak at 1649 cm<sup>-1</sup> (peak b) is assigned to C=O stretching of amide and 1462 cm<sup>-1</sup> (peak c) is assigned to C–N bond of amine. The stretching bands of S=O in SBMA appears at 1044 cm<sup>-1</sup> (peak e). <sup>1</sup>H NMR spectrum was shown in Fig. S1b. The peaks at δ=1.48~1.60 (a) and δ=1.91~2.01 (b) were assigned to methylene (a) and methyldyne (b) produced from the polymerization of carbon-carbon double bonds, respectively. The others are assigned as follows: δ=1.1 (g, CH(CH<sub>3</sub>)<sub>2</sub>), 2.2 (m, CH<sub>2</sub>CH<sub>2</sub>SO<sub>3</sub><sup>-</sup>), 2.89 (n, CH<sub>2</sub>CH<sub>2</sub>SO<sub>3</sub><sup>-</sup>), 3.16 (k, N<sup>+</sup>(CH<sub>3</sub>)<sub>2</sub>), 3.52 (l, N<sup>+</sup>CH<sub>2</sub>CH<sub>2</sub>CH<sub>2</sub>SO<sub>3</sub><sup>-</sup>), 3.71 (j, COOCH<sub>2</sub>CH<sub>2</sub>), 3.79 (f, CH(CH<sub>3</sub>)<sub>2</sub>), 4.41 (i, COOCH<sub>2</sub>; h, CONHCH<sub>2</sub>NHCO).

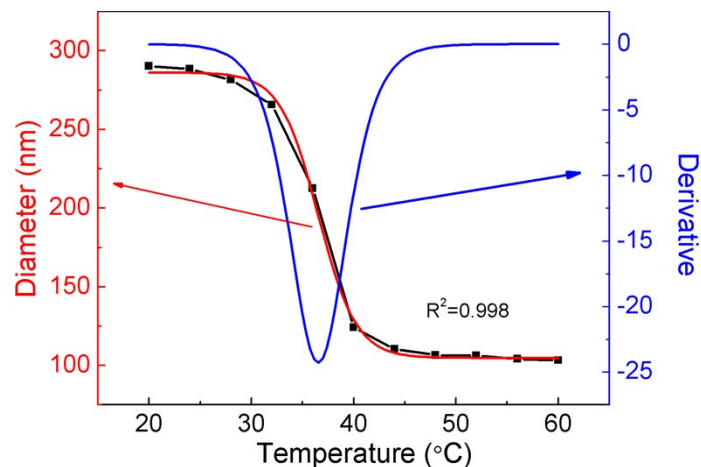

**Fig. S2** Diameters of PNA nanogels *versus* temperature.

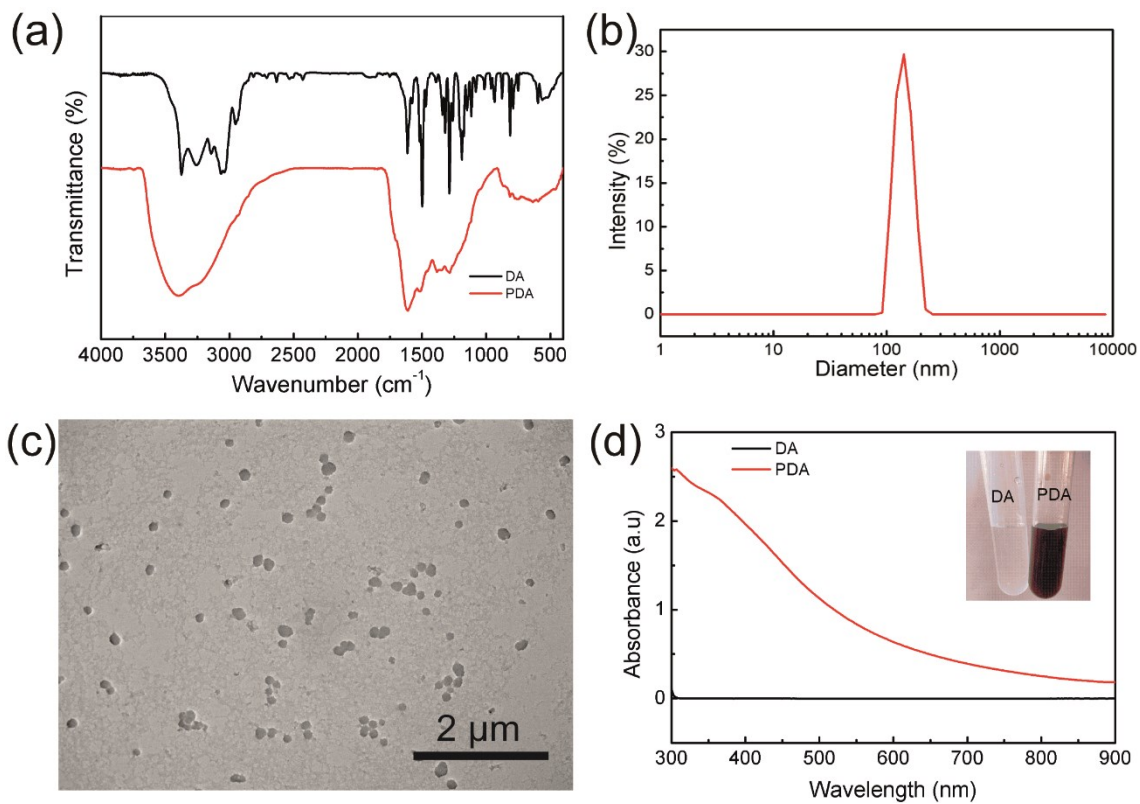

**Fig. S3** (a) FT-IR spectra of PDA NPs. (b) Hydrodynamic diameter of PDA NPs and its distribution measured by DLS. (c) TEM image of PDA NPs and (d) UV-Vis-NIR spectra of PDA NPs aqueous suspension and DA aqueous solution (both the concentration of DA and PDA NPs were 200  $\mu\text{g/mL}$ ).

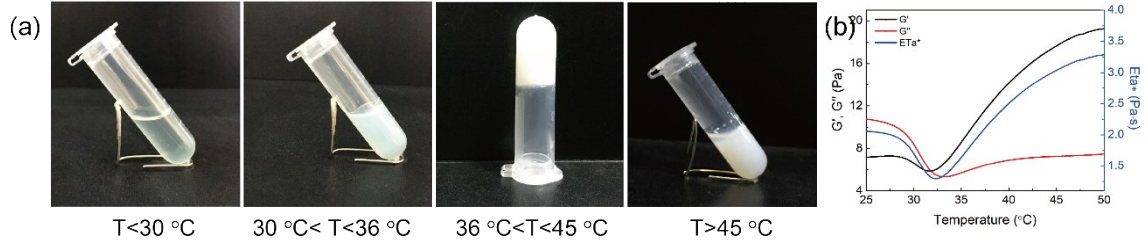

**Fig. S4** (a) Photographs and (b) rheology behavior of the sol-gel transition of PNS dispersion (25 wt%).

### Photothermal conversion efficiency of PDA NPs

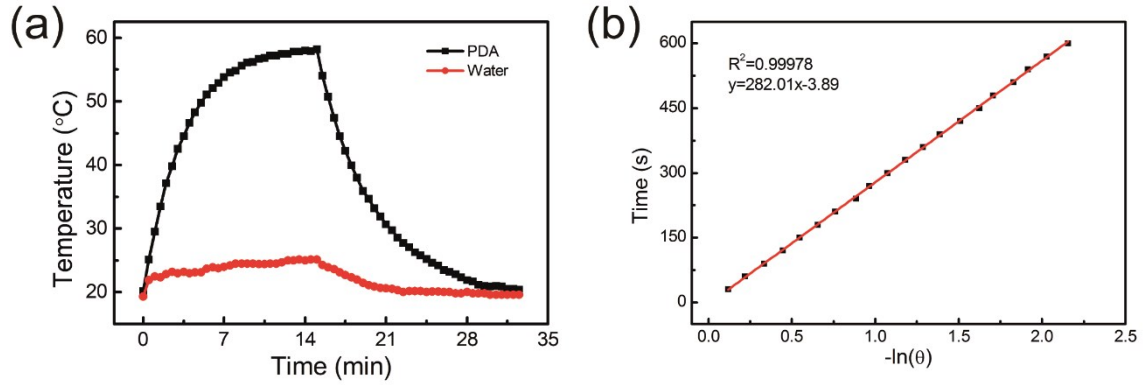

**Fig. S5** (a) Temperature change curve of PDA NPs dispersion (200 µg/mL) under NIR laser irradiation (808 nm, 1.0 W/cm<sup>2</sup>) for 15 min and then shutting off the laser, and (b) linear relationship of time *versus*  $-\ln\theta$  obtained from the cooling curve in (a).

The photothermal conversion efficiency ( $\eta$ ) of PDA NPs can be calculated according to Eq. S1 as reported<sup>1,2</sup> and the experimental data.

$$\eta = \frac{hA\Delta T_{\max} - Q_s}{I(1 - 10^{-A_\lambda})} \quad (\text{Eq. S1})$$

Wherein  $h$  is the heat transfer coefficient,  $A$  is the surface area of the container,  $\Delta T_{\max}$  is the maximum temperature change of PDA NPs suspension at the steady-state temperature,  $I$  is the laser power density used,  $A_\lambda$  is the absorbance of the PDA NPs suspension at 808 nm, and  $Q_s$  is the heat of the solvent (water) produced by the laser irradiation.

In this system,  $\Delta T_{\max}$  was 38.0 °C (Fig. S5a),  $A_\lambda$  was 0.237 (Fig. S3d,  $l=1$  cm) and  $I$  was 1.0 W/cm<sup>2</sup>.  $Q_s$  could be calculated from  $Q_s = C_{\text{water}} m \Delta T / t = 4.2 \text{ J}/(\text{g} \cdot ^\circ\text{C}) \times 0.30 \text{ g} \times 5.8 \text{ }^\circ\text{C} / 900 \text{ s} = 8.12 \text{ mW}$ .  $hA$  was obtained by applying the linear time data from the cooling period *vs*  $-\ln\theta$  (Fig. S5b) and Eq. S2. Herein,  $\theta$  is defined in Eq. S3,  $m$  and  $C_p$  are the mass (0.30 g) and heat capacity of water (4.2 J/(g·°C)).

$$\tau_s = \frac{\sum_i m_i c_{p,i}}{hA} \quad (\text{Eq. S2})$$

$$\theta = \frac{\Delta T}{\Delta T_{\max}} = \frac{T - T_{\text{surf}}}{T_{\max} - T_{\text{surf}}} \quad (\text{Eq. S3})$$

According to the data in Fig. S5a and Eq. 3,  $-\ln\theta$  at different time could be calculated out. In addition, the slope of the fitted line in Fig. S5b was the time constant  $\tau_s$  (281.01). Therefore,  $hA$  equaled to 4.48 mW/°C according to Eq. S2 and  $\eta$  was 38.5% based on Eq. S1.

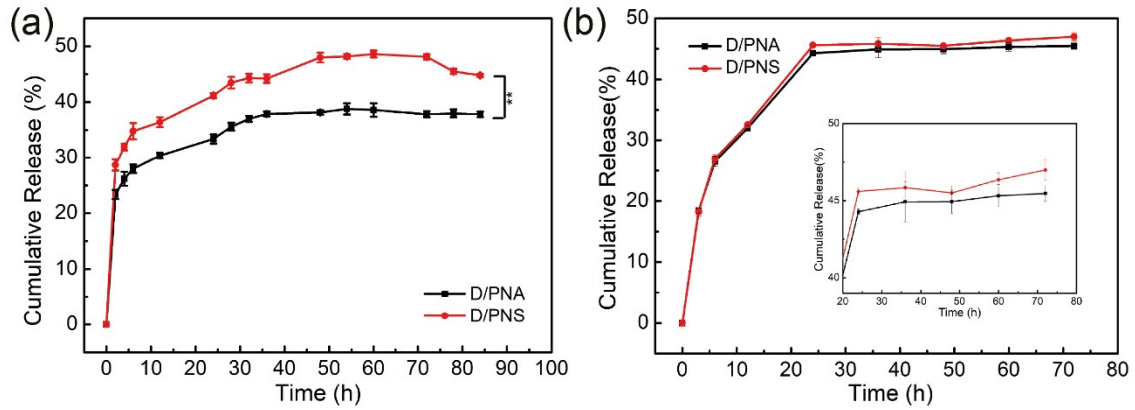

**Fig. S6** *In vitro* DOX release profiles of D/PNS and D/PNA hydrogels. (a) Without and (b) with FBS adsorbed on the DOX-loaded hydrogel (n=3). Note: \*\*  $P < 0.01$ , with significant difference.

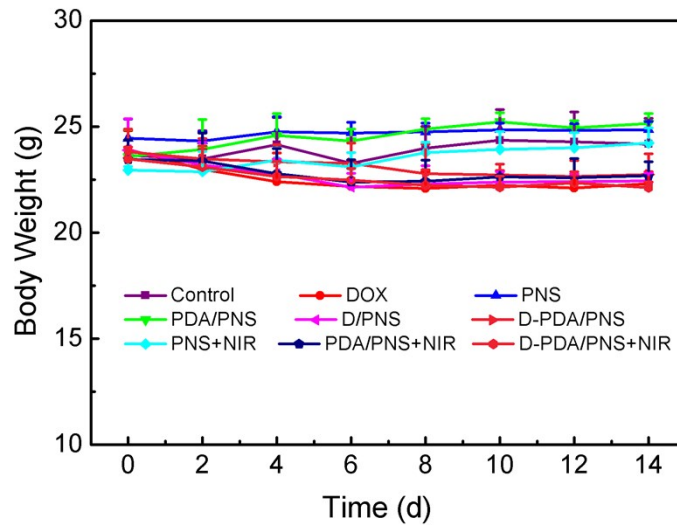

**Fig. S7** Body weight of mice *versus* time.

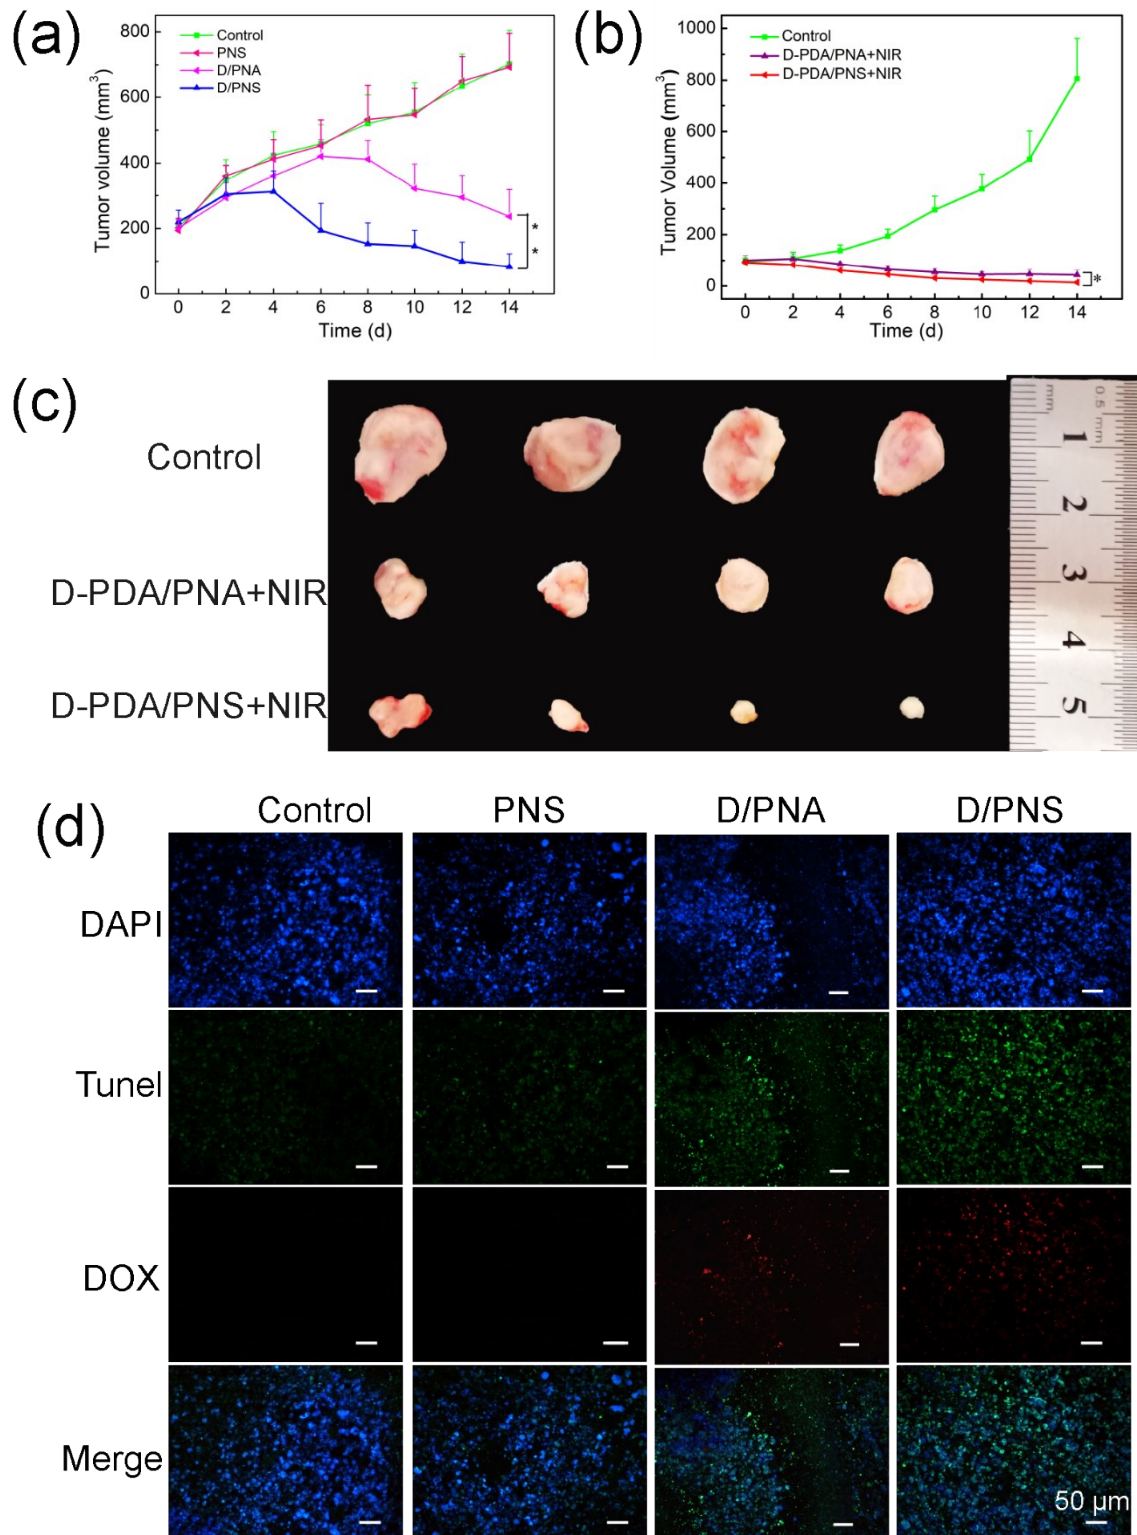

**Fig. S8** *In vivo* anti-tumor effect. (a) Tumour volumes change of D/PNS compared with D/PNA versus time. (b) Tumour volumes change of D-PDA/PNS compared with D-PDA/PNA *versus* time and (c) the corresponding photographs of the peeled tumours after intratumoral injection for 14 days. (d) Fluorescence

images of tumour tissue slice stained by Tunel. \*\* $P < 0.01$ , \* $P < 0.05$ .

### **References**

- 1 Y. Gao, X. Wu, L. Zhou, Y. Su and C. M. Dong, *Macromol. Rapid. Comm.*, 2015, **36**, 916–922.
- 2 Y. L. Liu, K. L. Ai, J. H. Liu, M. Deng, Y. Y. He and L. H. Lu, *Adv. Mater.*, 2013, **25**, 1353–1359.
